# Supplementary material for: Technical note: TEOS-10 EXCEL – Implementation of the Thermodynamic Equation Of Seawater – 2010 in EXCEL
Source: Copernicus journal article supplement (doi:10.5194/os-2022-2), 2022-01-17
Supplement: Supplementary file [file os-2022-2-AC3-supplement.pdf]

**Table 1.** List of all VBA Modules and formulas included in v.2.0 of TEOS-10 Excel. Direct translations from GSW are marked with ‘YES’ and original or modified functions marked with ‘NO’.

| VBA Module                                   | GSW | Description                                                                                                                                                                                                                                                                                                                 |
|----------------------------------------------|-----|-----------------------------------------------------------------------------------------------------------------------------------------------------------------------------------------------------------------------------------------------------------------------------------------------------------------------------|
| CT_from_pt(SA, pt)                           | YES | Calculates Conservative Temperature of seawater from potential temperature (whose reference sea pressure is zero dbar)                                                                                                                                                                                                      |
| Entropy_part (SA, t, p)                      | YES | This function calculates entropy, except that it does not evaluate any terms that are functions of Absolute Salinity alone. This function is called by {pt0_from_t}                                                                                                                                                         |
| Entropy_part_zerop (SA, pt0)                 | YES | This function calculates entropy at a sea pressure of zero, except that it does not evaluate any terms that are functions of Absolute Salinity alone. This function is called by {pt0_from_t}                                                                                                                               |
| Gibbs_pt0_pt0 (SA, pt0)                      | YES | This function calculates the second derivative of the specific Gibbs function with respect to temperature at zero sea pressure. This function is called by {pt0_from_t}                                                                                                                                                     |
| Hill_ratio_at_SP2(t)                         | YES | Calculates the Hill ratio, which is the adjustment needed to apply for Practical Salinities smaller than 2. This function is called by {SP_from_C(C,t,p)} and {SP_from_R(R,t,p)}                                                                                                                                            |
| is_Baltic(lon, lat)                          | NO  | Checks if a location is in the Baltic Sea. This function is original and different from the GSW counterpart. Baltic limits are taken from Figure 2 of Feistel et al. (2019: 6)                                                                                                                                              |
| LookUp_atlas(table_name, p, lon, lat)        | NO  | This function builds and interrogates the Atlas database and was developed specifically for the EXCEL implementation of TEOS-10. 'table-name' can be one of the two look-up tables [deltaSA_ref] or [SAAR_ref]. Results are a 3D interpolation of the 8 vertices of the cube around the (lon, lat, p) location in the ocean |
| pt0_from_t(SA, t, p)                         | YES | Calculates potential temperature with reference pressure, p_ref = 0 dbar.                                                                                                                                                                                                                                                   |
| rho(SA, CT, p)                               | YES | Calculates in-situ density from Absolute Salinity, Conservative Temperature, and pressure                                                                                                                                                                                                                                   |
| SA_Baltic(SP)                                | YES | Calculates Absolute Salinity in the Baltic from Practical Salinity                                                                                                                                                                                                                                                          |
| sigma_CT_line(SA, sigma, min_temp, max_temp) | NO  | Calculates Conservative Temperature (CT) from SA at a constant sigma value (e.g., 25) between min_temp and max_temp. Function used to build potential density (sigma) lines to be plotted in the Absolute Salinity - Conservative Temperature Diagram. It calls the {sigma0(SA,CT)} function                                |
| sigma0(SA, CT)                               | YES | Calculates potential density anomaly with reference pressure of 0 dbar                                                                                                                                                                                                                                                      |
| Sound_Speed(SA, CT, p)                       | YES | Calculates the speed of sound in seawater from Absolute Salinity, Conservative Temperature, and pressure                                                                                                                                                                                                                    |
| SP_from_C(C,t,p)                             | YES | Calculates Practical Salinity from Conductivity, temperature, and pressure                                                                                                                                                                                                                                                  |
| SP_from_R(R,t,p)                             | YES | Calculates Practical Salinity from the conductivity Ratio, temperature, and pressure                                                                                                                                                                                                                                        |
| <b>Formulas used outside VBA Modules</b>     |     |                                                                                                                                                                                                                                                                                                                             |
| $t = t_{68} / 1.00024$                       | YES | Calculates temperature ITS-90 from temperature IPTS-68                                                                                                                                                                                                                                                                      |
| $S_R = S_p * 35.16504 / 35$                  | YES | Calculates Reference Salinity ( $S_R$ ) from Practical Salinity ( $S_p$ )                                                                                                                                                                                                                                                   |
| $\delta S_A = S_R * [SAAR\_Atlas]$           | YES | Absolute Salinity Anomaly equals the product of Reference Salinity by the interpolated Absolute Salinity Anomaly Ratio                                                                                                                                                                                                      |
| $S_A = S_R + \delta S_A$                     | YES | Absolute Salinity equals Reference Salinity plus Absolute Salinity Anomaly                                                                                                                                                                                                                                                  |
