# Supplementary material for: Technical note: TEOS-10 EXCEL – Implementation of the Thermodynamic Equation Of Seawater – 2010 in EXCEL
Source: Copernicus journal article supplement (doi:10.5194/os-2022-2), 2022-01-17
Supplement: Supplementary file [file os-2022-2-AC6-supplement.pdf]

Line 102:

- Salinity: the user can toggle the input between Practical Salinity (the salinity quantity which continues to be the recommended quantity to be archived (IOC, SCOR and IAPSO, 2010)), conductivity ( $\text{mS cm}^{-1}$ ) (i.e., measured by an *in situ* transducer), or the salinometer ratio (Rt) (i.e., ratio between the conductivities of the sample and of Standard Sea Water, measured by a laboratory salinometer). Column 'D' of the spreadsheet ('Practical Salinity ( $S_P$ )') either copies the  $S_P$  value if this was the salinity input or calculates  $S_P$  from conductivity using function  $\{SP\_from\_C(C, t, p)\}$  or from a salinometer conductivity ratio using function  $\{SP\_salinometer(Rt, t)\}$ , depending on the radio button selected. In the latter option, 't' is the temperature of the thermostable bath of the laboratory salinometer.

Line 206:

### 3.1. Practical Salinity ( $S_P$ )

$S_P$  is computed from conductivity using function  $\{SP\_from\_C(C, t, p)\}$  or from the conductivity ratio (Rt) reading of a laboratory salinometer using function  $\{SP\_salinometer(Rt, t)\}$ , depending on the radio button selected. Practical Salinity is a dimensionless quantity, although PSU (Practical Salinity Units) is commonly used. For reference, the calculation algorithm is designed so that the conductivity of Reference Composition Seawater at  $S_P = 35$ ,  $t_{68} = 15$ ,  $p = 0$  is  $42.9140 \text{ mS cm}^{-1}$ , which can be used to validate the function. For the salinometer ratio function, a ratio = 1 will result in  $S_P = 35$ , independently of the temperature. If  $S_P < 2$  both functions call the  $\{Hill\_ratio\_at\_SP2(t)\}$  module which corrects the  $S_P$  value based on the Hill et al. (1986) algorithm. This algorithm is adjusted so that it is exactly equal to the PSS-78 algorithm at  $S_P = 2$ .

A VBA module to calculate Practical Salinity from the conductivity ratio (R), of a sample at temperature (t), and pressure (p) relative to SSW at  $t=15^\circ\text{C}$  and  $p=0$  is also included  $\{SP\_from\_R(R, t, p)\}$  but it is not currently used in the template spreadsheets.

Updated Table 1

| VBA Module                                   | GSW | Description                                                                                                                                                                                                                                                                                                                 |
|----------------------------------------------|-----|-----------------------------------------------------------------------------------------------------------------------------------------------------------------------------------------------------------------------------------------------------------------------------------------------------------------------------|
| CT_from_pt(SA, pt)                           | YES | Calculates Conservative Temperature of seawater from potential temperature (whose reference sea pressure is zero dbar)                                                                                                                                                                                                      |
| Entropy_part (SA, t, p)                      | YES | This function calculates entropy, except that it does not evaluate any terms that are functions of Absolute Salinity alone. This function is called by {pt0_from_t}                                                                                                                                                         |
| Entropy_part_zerop (SA, pt0)                 | YES | This function calculates entropy at a sea pressure of zero, except that it does not evaluate any terms that are functions of Absolute Salinity alone. This function is called by {pt0_from_t}                                                                                                                               |
| Gibbs_pt0_pt0 (SA, pt0)                      | YES | This function calculates the second derivative of the specific Gibbs function with respect to temperature at zero sea pressure. This function is called by {pt0_from_t}                                                                                                                                                     |
| Hill_ratio_at_SP2(t)                         | YES | Calculates the Hill ratio, which is the adjustment needed to apply for Practical Salinities smaller than 2. This function is called by {SP_from_C(C,t,p)} and {SP_from_R(R,t,p)}                                                                                                                                            |
| is_Baltic(lon, lat)                          | NO  | Checks if a location is in the Baltic Sea. This function is original and different from the GSW counterpart. Baltic limits are taken from Figure 2 of Feistel et al. (2019: 6)                                                                                                                                              |
| LookUp_atlas(table_name, p, lon, lat)        | NO  | This function builds and interrogates the Atlas database and was developed specifically for the EXCEL implementation of TEOS-10. 'table-name' can be one of the two look-up tables [deltaSA_ref] or [SAAR_ref]. Results are a 3D interpolation of the 8 vertices of the cube around the (lon, lat, p) location in the ocean |
| pt0_from_t(SA, t, p)                         | YES | Calculates potential temperature with reference pressure, p_ref = 0 dbar.                                                                                                                                                                                                                                                   |
| rho(SA, CT, p)                               | YES | Calculates in-situ density from Absolute Salinity, Conservative Temperature, and pressure                                                                                                                                                                                                                                   |
| SA_Baltic(SP)                                | YES | Calculates Absolute Salinity in the Baltic from Practical Salinity                                                                                                                                                                                                                                                          |
| sigma_CT_line(SA, sigma, min_temp, max_temp) | NO  | Calculates Conservative Temperature (CT) from SA at a constant sigma value (e.g., 25) between min_temp and max_temp. Function used to build potential density (sigma) lines to be plotted in the Absolute Salinity - Conservative Temperature Diagram. It calls the {sigma0(SA,CT)} function                                |
| sigma0(SA, CT)                               | YES | Calculates potential density anomaly with reference pressure of 0 dbar                                                                                                                                                                                                                                                      |
| Sound_Speed(SA, CT, p)                       | YES | Calculates the speed of sound in seawater from Absolute Salinity, Conservative Temperature, and pressure                                                                                                                                                                                                                    |
| SP_from_C(C,t,p)                             | YES | Calculates Practical Salinity from Conductivity (mS/cm), temperature, and pressure                                                                                                                                                                                                                                          |
| SP_from_R(R,t,p)                             | YES | Calculates Practical Salinity from the conductivity ratio (R), of a sample at temperature (t), and pressure (p) relative to SSW at t=15 °C and p=0                                                                                                                                                                          |
| SP_salinometer(Rt, t)                        | YES | Calculates Practical Salinity from the conductivity ratio reading of a laboratory Salinometer (Rt), where the sample and the SSW reference are at the same temperature (t).                                                                                                                                                 |
| <b>Formulas used outside VBA Modules</b>     |     |                                                                                                                                                                                                                                                                                                                             |
| $t = t_{68} / 1.00024$                       | YES | Calculates temperature ITS-90 from temperature IPTS-68                                                                                                                                                                                                                                                                      |
| $S_R = S_P * 35.16504 / 35$                  | YES | Calculates Reference Salinity ( $S_R$ ) from Practical Salinity ( $S_P$ )                                                                                                                                                                                                                                                   |

|                                    |     |                                                                                                                        |
|------------------------------------|-----|------------------------------------------------------------------------------------------------------------------------|
| $\delta S_A = S_R * [SAAR\_Atlas]$ | YES | Absolute Salinity Anomaly equals the product of Reference Salinity by the interpolated Absolute Salinity Anomaly Ratio |
| $S_A = S_R + \delta S_A$           | YES | Absolute Salinity equals Reference Salinity plus Absolute Salinity Anomaly                                             |

Updated Fig.1

|    | A                                                              | B                                                                                     | C                                         | D                                                                                                                                                                                              | E                                    | F                          | G                     | H                                            | I                                   | J                  | K                         | L                                          | M                                   | N                                       | O                    |
|----|----------------------------------------------------------------|---------------------------------------------------------------------------------------|-------------------------------------------|------------------------------------------------------------------------------------------------------------------------------------------------------------------------------------------------|--------------------------------------|----------------------------|-----------------------|----------------------------------------------|-------------------------------------|--------------------|---------------------------|--------------------------------------------|-------------------------------------|-----------------------------------------|----------------------|
| 1  | Longitude                                                      | 162.5                                                                                 | degrees                                   | Longitude and Latitude are needed for estimating the Absolute Salinity Anomaly, if either is left blank, Absolute Salinity Anomaly is set to zero.                                             |                                      |                            |                       |                                              |                                     |                    |                           |                                            |                                     |                                         |                      |
| 2  | Latitude                                                       | 33                                                                                    | degrees                                   | User data should be input in white cells only! All coloured columns will update automatically. DATA CAN BE DELETED BUT NOT MOVED prior to deletion OR THE FORMULAS WILL LOOSE THEIR REFERENCE. |                                      |                            |                       |                                              |                                     |                    |                           |                                            |                                     |                                         |                      |
| 3  | Pressure (dbar)                                                | Salinity<br>* Practical Salinity<br>* Conductivity (mS/cm)<br>* Salinometer Ratio (R) | Temperature (°C)<br>* ITS-90<br>* IPTS-68 | Practical Salinity (S <sub>p</sub> )                                                                                                                                                           | Reference Salinity (S <sub>r</sub> ) | delta S <sub>A</sub> Atlas | SAAR Atlas            | Absolute Salinity Anomaly (δS <sub>A</sub> ) | Absolute Salinity (S <sub>A</sub> ) | Temperature ITS-90 | Potential temperature (θ) | Conservative Temperature (θ <sub>c</sub> ) | Potential Density (σ <sub>θ</sub> ) | In situ Density (ρ <sub>s, s, s</sub> ) | Sound Speed (c)      |
| 4  |                                                                |                                                                                       |                                           |                                                                                                                                                                                                | (g kg <sup>-1</sup> )                | (g kg <sup>-1</sup> )      | (g kg <sup>-1</sup> ) | (g kg <sup>-1</sup> )                        | (g kg <sup>-1</sup> )               | (°C)               | (°C)                      | (°C)                                       | (kg m <sup>-3</sup> · 1000)         | (kg m <sup>-3</sup> )                   | (m s <sup>-1</sup> ) |
| 4  | 0                                                              | 34.57586                                                                              | 19.507610                                 | 34.5759                                                                                                                                                                                        | 34.7389                              | 0.000327101505             | 0.000009410247        | 0.000326901616                               | 34.7392                             | 19.5076            | 19.5076                   | 19.5130                                    | 24.5709                             | 1024.5709                               | 1519.5537            |
| 5  | 10                                                             | 34.74774                                                                              | 20.008300                                 | 34.7477                                                                                                                                                                                        | 34.9116                              | 0.000339231758             | 0.00009773386         | 0.000341204433                               | 34.9119                             | 20.0083            | 20.0065                   | 20.0072                                    | 24.5716                             | 1024.6148                               | 1521.2985            |
| 6  | 20                                                             | 34.67881                                                                              | 19.133700                                 | 34.6788                                                                                                                                                                                        | 34.8423                              | 0.000333521590             | 0.00009747636         | 0.000339630409                               | 34.8427                             | 19.1338            | 19.1302                   | 19.1319                                    | 24.7466                             | 1024.8333                               | 1518.9434            |
| 7  | 30                                                             | 34.68279                                                                              | 18.834320                                 | 34.6828                                                                                                                                                                                        | 34.8463                              | 0.000375042687             | 0.00010501871         | 0.000368739417                               | 34.8467                             | 18.8343            | 18.8290                   | 18.8302                                    | 24.8264                             | 1024.9566                               | 1518.2704            |
| 8  | 40                                                             | 34.68397                                                                              | 19.289160                                 | 34.6840                                                                                                                                                                                        | 34.8475                              | 0.000389800378             | 0.00011376763         | 0.000396451974                               | 34.8479                             | 19.2882            | 19.2813                   | 19.2817                                    | 24.9648                             | 1025.1387                               | 1516.8712            |
| 9  | 50                                                             | 34.68661                                                                              | 17.893830                                 | 34.6866                                                                                                                                                                                        | 34.8522                              | 0.000430311856             | 0.00012931657         | 0.000450996471                               | 34.8526                             | 17.8938            | 17.8953                   | 17.8952                                    | 25.0661                             | 1025.2838                               | 1515.9962            |
| 10 | 60                                                             | 34.69963                                                                              | 17.056150                                 | 34.6996                                                                                                                                                                                        | 34.8633                              | 0.000569195077             | 0.00016219010         | 0.000565447460                               | 34.8638                             | 17.0561            | 17.0436                   | 17.0423                                    | 25.2778                             | 1025.6097                               | 1513.8627            |
| 11 | 70                                                             | 34.69791                                                                              | 16.492310                                 | 34.6979                                                                                                                                                                                        | 34.8615                              | 0.000696512528             | 0.00019779266         | 0.00069535385                                | 34.8622                             | 16.4923            | 16.4761                   | 16.4742                                    | 25.4100                             | 1025.8520                               | 1512.5741            |
| 12 | 126                                                            | 34.71489                                                                              | 16.128450                                 | 34.7149                                                                                                                                                                                        | 34.8786                              | 0.000843341842             | 0.00023960698         | 0.000835715273                               | 34.8794                             | 16.1285            | 16.1085                   | 16.1059                                    | 25.5080                             | 1026.0600                               | 1511.8947            |
| 13 | 151                                                            | 34.68967                                                                              | 15.684310                                 | 34.6897                                                                                                                                                                                        | 34.8532                              | 0.001091654449             | 0.00020396145         | 0.001098907859                               | 34.8542                             | 15.6843            | 15.6608                   | 15.6586                                    | 25.5905                             | 1026.2530                               | 1510.9066            |
| 14 | 176                                                            | 34.65537                                                                              | 15.247770                                 | 34.6554                                                                                                                                                                                        | 34.8188                              | 0.001146533554             | 0.00023958859         | 0.001147587425                               | 34.8199                             | 15.2478            | 15.2209                   | 15.2191                                    | 25.6623                             | 1026.4358                               | 1509.9149            |
| 15 | 202                                                            | 34.63723                                                                              | 15.028760                                 | 34.6372                                                                                                                                                                                        | 34.8006                              | 0.001306176088             | 0.00038329968         | 0.001333904319                               | 34.8019                             | 15.0288            | 14.9982                   | 14.9967                                    | 25.6975                             | 1026.5858                               | 1509.6304            |
| 16 | 252                                                            | 34.58649                                                                              | 14.440070                                 | 34.5865                                                                                                                                                                                        | 34.7496                              | 0.00155887022              | 0.00045529491         | 0.001596030542                               | 34.7512                             | 14.4401            | 14.4029                   | 14.4022                                    | 25.7872                             | 1026.8977                               | 1508.1654            |
| 17 | 303                                                            | 34.53391                                                                              | 13.762160                                 | 34.5339                                                                                                                                                                                        | 34.6968                              | 0.001918317195             | 0.00056693585         | 0.001967083277                               | 34.6987                             | 13.7622            | 13.7189                   | 13.7189                                    | 25.8905                             | 1027.2291                               | 1507.0947            |
| 18 | 353                                                            | 34.44696                                                                              | 12.587460                                 | 34.4470                                                                                                                                                                                        | 34.6094                              | 0.002406799849             | 0.00074277399         | 0.002570966638                               | 34.6120                             | 12.5875            | 12.5399                   | 12.5411                                    | 26.0606                             | 1027.6275                               | 1503.9112            |
| 19 | 404                                                            | 34.37410                                                                              | 11.910510                                 | 34.3741                                                                                                                                                                                        | 34.5362                              | 0.00309205444              | 0.001011116678        | 0.003492184663                               | 34.5397                             | 11.9105            | 11.5588                   | 11.5609                                    | 26.1915                             | 1027.9520                               | 1501.2222            |
| 20 | 505                                                            | 34.17081                                                                              | 8.99112                                   | 34.1768                                                                                                                                                                                        | 34.3380                              | 0.004843227283             | 0.00152354201         | 0.005231537736                               | 34.3432                             | 8.9981             | 8.9429                    | 8.9471                                     | 26.4886                             | 1028.7658                               | 1493.3821            |
| 21 | 606                                                            | 34.04839                                                                              | 6.567234                                  | 34.0484                                                                                                                                                                                        | 34.2089                              | 0.007328918773             | 0.002277880674        | 0.007453467487                               | 34.2164                             | 6.5672             | 6.5115                    | 6.5167                                     | 26.7417                             | 1029.5063                               | 1485.5902            |
| 22 | 707                                                            | 34.05378                                                                              | 5.180429                                  | 34.0538                                                                                                                                                                                        | 34.2144                              | 0.010134516840             | 0.002023431730        | 0.010395782927                               | 34.2244                             | 5.1804             | 5.1224                    | 5.1270                                     | 26.9196                             | 1030.1657                               | 1481.6929            |
| 23 | 808                                                            | 34.13533                                                                              | 4.453666                                  | 34.1353                                                                                                                                                                                        | 34.2963                              | 0.02091654009              | 0.00365710481         | 0.02542510996                                | 34.3088                             | 4.4539             | 4.3944                    | 4.3949                                     | 27.0677                             | 1030.7880                               | 1480.4628            |
| 24 | 909                                                            | 34.21526                                                                              | 4.019992                                  | 34.2153                                                                                                                                                                                        | 34.3766                              | 0.014899810655             | 0.00245731210         | 0.014863425841                               | 34.3912                             | 4.0110             | 3.9430                    | 3.9457                                     | 27.1910                             | 1031.3704                               | 1480.3736            |
| 25 | 1010                                                           | 34.28701                                                                              | 3.630195                                  | 34.2870                                                                                                                                                                                        | 34.4487                              | 0.01861212555              | 0.00373423199         | 0.018630275281                               | 34.4650                             | 3.6302             | 3.5568                    | 3.5588                                     | 27.2768                             | 1031.9375                               | 1480.3190            |
| 26 | 1111                                                           | 34.33858                                                                              | 3.251027                                  | 34.3386                                                                                                                                                                                        | 34.5005                              | 0.021665054983             | 0.004755059480        | 0.021755059480                               | 34.5181                             | 3.2513             | 3.2270                    | 3.2286                                     | 27.3612                             | 1032.5152                               | 1480.2736            |
| 27 | 1213                                                           | 34.39449                                                                              | 3.021774                                  | 34.3945                                                                                                                                                                                        | 34.5466                              | 0.02487496637              | 0.00538077622         | 0.02495891781                                | 34.5652                             | 3.0222             | 3.0069                    | 3.0081                                     | 27.4474                             | 1033.0966                               | 1480.1762            |
| 28 | 1314                                                           | 34.44246                                                                              | 2.879307                                  | 34.4423                                                                                                                                                                                        | 34.5866                              | 0.029184919089             | 0.00635454629         | 0.029181793828                               | 34.6060                             | 2.8763             | 2.8591                    | 2.8581                                     | 27.4607                             | 1033.2292                               | 1482.4828            |
| 29 | 1416                                                           | 34.45672                                                                              | 2.694073                                  | 34.4567                                                                                                                                                                                        | 34.6192                              | 0.029176311154             | 0.006200295154        | 0.029201614473                               | 34.6293                             | 2.6941             | 2.5966                    | 2.5974                                     | 27.4707                             | 1033.0426                               | 1483.4231            |
| 30 | 1517                                                           | 34.45842                                                                              | 2.504860                                  | 34.4584                                                                                                                                                                                        | 34.6504                              | 0.029099922399             | 0.006077924084        | 0.029177924084                               | 34.6507                             | 2.5049             | 2.4084                    | 2.4092                                     | 27.4814                             | 1033.1424                               | 1484.1121            |
| 31 | 1618                                                           | 34.45401                                                                              | 2.196994                                  | 34.4540                                                                                                                                                                                        | 34.7019                              | 0.021602210953             | 0.00514741418         | 0.021430101478                               | 34.7230                             | 2.1970             | 2.0767                    | 2.0772                                     | 27.6106                             | 1033.7882                               | 1487.2625            |
| 32 | 1719                                                           | 34.58881                                                                              | 1.953539                                  | 34.5888                                                                                                                                                                                        | 34.7516                              | 0.021908000180             | 0.006062578399        | 0.021733094502                               | 34.7736                             | 1.9533             | 1.8154                    | 1.8154                                     | 27.6743                             | 1037.0030                               | 1490.4866            |
| 33 | 2025                                                           | 34.61341                                                                              | 1.827004                                  | 34.6134                                                                                                                                                                                        | 34.7769                              | 0.021034845636             | 0.00625568061         | 0.021034845636                               | 34.7984                             | 1.8258             | 1.6682                    | 1.6682                                     | 27.7053                             | 1038.1628                               | 1494.2095            |
| 34 | 2276                                                           | 34.70526                                                                              | 1.709283                                  | 34.6313                                                                                                                                                                                        | 34.7883                              | 0.016151781093             | 0.007410961302        | 0.016151781093                               | 34.7916                             | 1.7093             | 1.5399                    | 1.5399                                     | 27.7221                             | 1039.2561                               | 1496.1121            |
| 35 | 2789                                                           | 34.64812                                                                              | 1.626311                                  | 34.6481                                                                                                                                                                                        | 34.8115                              | 0.021385737943             | 0.006814436829        | 0.02138466131                                | 34.8329                             | 1.6263             | 1.4264                    | 1.4267                                     | 27.7501                             | 1040.5169                               | 1501.9703            |
| 36 | 3045                                                           | 34.66890                                                                              | 1.566966                                  | 34.6689                                                                                                                                                                                        | 34.8213                              | 0.02079155635              | 0.00670799852         | 0.020791693528                               | 34.8435                             | 1.5661             | 1.3432                    | 1.3434                                     | 27.7651                             | 1041.6695                               | 1506.0602            |
| 37 | 3271                                                           | 34.55710                                                                              | 1.460194                                  | 34.8306                                                                                                                                                                                        | 34.8271                              | 0.02094711621              | 0.00670799852         | 0.02094711621                                | 34.8281                             | 1.5209             | 1.2809                    | 1.2810                                     | 27.7841                             | 1042.8867                               | 1510.4242            |
| 38 | 3566                                                           | 34.67310                                                                              | 1.503932                                  | 34.8732                                                                                                                                                                                        | 34.8074                              | 0.02014749725              | 0.00670799852         | 0.02023026590                                | 34.8574                             | 1.5039             | 1.2809                    | 1.2810                                     | 27.7841                             | 1042.8867                               | 1510.4242            |
| 39 | TEOS-10 Test Data TS-35 CTD-202 Surface Data Vertical Profiles |                                                                                       |                                           |                                                                                                                                                                                                |                                      |                            |                       |                                              |                                     |                    |                           |                                            |                                     |                                         |                      |
| 40 |                                                                |                                                                                       |                                           |                                                                                                                                                                                                | SA-O4 Diagram                        | logos ref                  | depth ref             | p ref                                        | deltaS ref                          | SAAR ref           |                           |                                            |                                     |                                         |                      |
